# Supplementary material for: Structural mechanism for tyrosine hydroxylase inhibition by dopamine and reactivation by Ser40 phosphorylation
Source: PubMed Central journal article supplement (PMC8748767; doi:10.1038/s41467-021-27657-y), 2022-01-10
Supplement: 41467_2021_27657_MOESM2_ESM.pdf [file 41467_2021_27657_MOESM2_ESM.pdf]

### **Description of Additional Supplementary Files**

File Name: Supplementary Movie 1

Description: Structural rearrangements upon DA binding
